# Supplementary material
Source: PubMed Central journal article supplement (PMC8166235)
Supplement: NIHMS1700295-supplement-Supplemental_Tables.pdf [file NIHMS1700295-supplement-Supplemental_Tables.pdf]

|                  |                  | <i>Parameter</i> | <i>Modification</i>  | <i>Limit</i> |                       |
|------------------|------------------|------------------|----------------------|--------------|-----------------------|
| <b>SAR</b>       | <b>Parameter</b> | 1                | RF Pulse Type        | Low SAR Mode | Manufacturer Options  |
|                  |                  | 2                | Concatenations       | Increase     | <2x exam Time         |
|                  |                  | 3                | Turbo Factor         | Reduce       | <2x exam Time         |
|                  |                  | 4                | Repetition Time (TR) | Increase     | Weighting, Time       |
|                  |                  | 5                | Flip Angle (FA)      | Reduce       | Contrast, Signal      |
|                  |                  | 6                | Slice Number         | Reduce       | <2x exam Time         |
| <b>Scan Time</b> | <b>Parameter</b> | 1                | Averages             | Reduce       | <2x exam Time         |
|                  |                  | 2                | Phase Oversampling   | Reduce       | 40% Reduction         |
|                  |                  | 3                | Parallel Imaging     | Increase     | 3x Acceleration       |
|                  |                  | 4                | Phase Resolution     | Reduce       | ½ Original Resolution |

**SUPPLEMENTAL TABLE 1.** Parameters used for modifying sequences to reach a given SAR limit.

|                           |                          | HEAD             |                  |                  |                     |                     |               |
|---------------------------|--------------------------|------------------|------------------|------------------|---------------------|---------------------|---------------|
|                           |                          | <i>T1 SE Sag</i> | <i>T1 SE Cor</i> | <i>T2 TSE Ax</i> | <i>T2 TSE DF Ax</i> | <i>Diffusion Ax</i> | <i>TOF Ax</i> |
| <b>RF Pulse Type</b>      | <i>SAR<sub>RT</sub></i>  | Normal           | Normal           | Normal           | Normal              | Normal              | -             |
|                           | <i>SAR<sub>LOW</sub></i> | Fast**           | Low SAR          | Low SAR          | Low SAR             | Low SAR             | -             |
| <b>Concatenations</b>     | <i>SAR<sub>RT</sub></i>  | 1                | 1                | 2                | 2                   | 1                   | 4             |
|                           | <i>SAR<sub>LOW</sub></i> | 1**              | 3                | 4                |                     |                     |               |
| <b>Turbo Factor</b>       | <i>SAR<sub>RT</sub></i>  | -                | -                | 17               | 16                  | -                   | -             |
|                           | <i>SAR<sub>LOW</sub></i> | 28**             |                  |                  | 14                  |                     |               |
| <b>TR</b>                 | <i>SAR<sub>RT</sub></i>  | 550              | 550              | 4000             | 9000                | 4300                | 23            |
|                           | <i>SAR<sub>LOW</sub></i> | 1240**           | 650              | 6000             | 13000               | 5000                | 50            |
| <b>Flip Angle</b>         | <i>SAR<sub>RT</sub></i>  | 90               | 90               | 150              | 150                 | -                   | 25            |
|                           | <i>SAR<sub>LOW</sub></i> | 15**             | 70               | 120              | 120                 |                     | 20            |
| <b>Slice Number</b>       | <i>SAR<sub>RT</sub></i>  | 25               | 30               | 25               | 25                  | 25                  | 40            |
|                           | <i>SAR<sub>LOW</sub></i> | 26**             | 15*              |                  |                     |                     |               |
| <b>Averages</b>           | <i>SAR<sub>RT</sub></i>  | 1                | 1                | 3                | 1                   | 3                   | 1             |
|                           | <i>SAR<sub>LOW</sub></i> | 1**              |                  | 1                |                     |                     |               |
| <b>Phase Oversampling</b> | <i>SAR<sub>RT</sub></i>  | 30               | -                | -                | -                   | -                   | -             |
|                           | <i>SAR<sub>LOW</sub></i> | 30**             |                  |                  |                     |                     |               |
| <b>Parallel imaging</b>   | <i>SAR<sub>RT</sub></i>  | -                | -                | GRAPPA 2         | -                   | GRAPPA 2            | GRAPPA 2      |
|                           | <i>SAR<sub>LOW</sub></i> | GRAPPA 2**       |                  |                  | GRAPPA 2            |                     |               |
| <b>Phase Resolution</b>   | <i>SAR<sub>RT</sub></i>  | 80               | 80               | 85               | 75                  | 100                 | 94            |
|                           | <i>SAR<sub>LOW</sub></i> | 80**             | 67               | 70               | 70                  |                     | 70            |
| <b>Scan Time</b>          | <i>SAR<sub>RT</sub></i>  | 03:07            | 02:24            | 03:46            | 04:32               | 01:06               | 04:38         |
|                           | <i>SAR<sub>LOW</sub></i> | 03:43**          | 04:31*           | 03:38            | 03:56               | 01:17               | 05:30         |

Note: \*: Sequence was separated in 2 parts

-: Parameters not applicable in the sequence

~: Sequence was not able to be optimized for the SAR limit

\*\* : Sequence changed

**SUPPLEMENTAL TABLE 2.** Parameter values per sequence for standard (*SAR<sub>RT</sub>*) and low-SAR (*SAR<sub>LOW</sub>*) protocols for the head anatomical region.

**C-SPINE**

|                               |                          | <b>T2 TSE<br/>Sag</b> | <b>T2 TSE<br/>STIR Sag</b> | <b>T1 TSE<br/>Sag</b> | <b>T1 TSE DF<br/>Sag</b> | <b>T2 TSE<br/>Ax</b> | <b>T2 SSFP-<br/>3D AX</b> |
|-------------------------------|--------------------------|-----------------------|----------------------------|-----------------------|--------------------------|----------------------|---------------------------|
| <b>RF Pulse Type</b>          | <i>SAR<sub>RT</sub></i>  | Normal                | Fast                       | Normal                | Normal                   | Normal               | Normal                    |
|                               | <i>SAR<sub>LOW</sub></i> | Low SAR               | Low SAR                    | Low SAR               | Low SAR                  | Low SAR              | Low SAR                   |
| <b>Concatenations</b>         | <i>SAR<sub>RT</sub></i>  | 1                     | 1                          | 1                     | 2                        | 1                    | -                         |
|                               | <i>SAR<sub>LOW</sub></i> | 2                     | 3                          | 4                     | 3                        | 3                    | -                         |
| <b>Turbo Factor</b>           | <i>SAR<sub>RT</sub></i>  | 18                    | 9                          | 3                     | 6                        | 13                   | -                         |
|                               | <i>SAR<sub>LOW</sub></i> | 14                    | 9                          | 4                     | 5                        | 8                    | -                         |
| <b>TR</b>                     | <i>SAR<sub>RT</sub></i>  | 3800                  | 3800                       | 550                   | 1900                     | 5000                 | 5.1                       |
|                               | <i>SAR<sub>LOW</sub></i> | 6500                  | 3800                       | 600                   | 2000                     | 6500                 | 7.6                       |
| <b>Flip Angle</b>             | <i>SAR<sub>RT</sub></i>  | 150                   | 150                        | 150                   | 150                      | 150                  | 63                        |
|                               | <i>SAR<sub>LOW</sub></i> | 120                   |                            | 135                   | 135                      |                      | 55                        |
| <b>Slice Number</b>           | <i>SAR<sub>RT</sub></i>  | 15                    | 15                         | 15                    | 15                       | 28                   | 56                        |
|                               | <i>SAR<sub>LOW</sub></i> |                       |                            |                       |                          |                      |                           |
| <b>Averages</b>               | <i>SAR<sub>RT</sub></i>  | 2                     | 2                          | 3                     | 1                        | 2                    | 1                         |
|                               | <i>SAR<sub>LOW</sub></i> | 1                     | 1                          | 1                     |                          | 1                    |                           |
| <b>Phase<br/>Oversampling</b> | <i>SAR<sub>RT</sub></i>  | 65                    | 80                         | 80                    | 80                       | 65                   | 50                        |
|                               | <i>SAR<sub>LOW</sub></i> |                       |                            |                       |                          | 70                   |                           |
| <b>Parallel imaging</b>       | <i>SAR<sub>RT</sub></i>  | GRAPPA 2              | GRAPPA 2                   | -                     | -                        | -                    | -                         |
|                               | <i>SAR<sub>LOW</sub></i> |                       |                            |                       | GRAPPA 2                 |                      |                           |
| <b>Phase Resolution</b>       | <i>SAR<sub>RT</sub></i>  | 100                   | 75                         | 70                    | 90                       | 80                   | 100                       |
|                               | <i>SAR<sub>LOW</sub></i> | 60                    |                            |                       |                          | 50                   |                           |
| <b>Scan Time</b>              | <i>SAR<sub>RT</sub></i>  | 03:53                 | 02:37                      | 04:29                 | 04:31                    | 04:27                | 03:43                     |
|                               | <i>SAR<sub>LOW</sub></i> | 03:30                 | 04:12                      | 04:54                 | 04:32                    | 04:15                | 05:31                     |

Note: \*: Sequence was separated in 2 parts

-: Parameters not applicable in the sequence

~: Sequence was not able to be optimized for the SAR limit

\*\* : Sequence changed

**SUPPLEMENTAL TABLE 3.** Parameter values per sequence for standard (*SAR<sub>RT</sub>*) and low-SAR (*SAR<sub>LOW</sub>*) protocols for the C-spine anatomical region.

T-SPINE

|                    |                    | T2 TSE Sag | T2 TSE STIR Sag | T2 TSE DIXON Sag | T1 TSE Sag | T1 TSE DF Ax | T1 TSE Ax |
|--------------------|--------------------|------------|-----------------|------------------|------------|--------------|-----------|
| RF Pulse Type      | SAR <sub>RT</sub>  | Low SAR    | Normal          | Normal           | Low SAR    | Normal       | Low SAR   |
|                    | SAR <sub>LOW</sub> |            | Low SAR         | Low SAR          |            | Low SAR      |           |
| Concatenations     | SAR <sub>RT</sub>  | 1          | 1               | 1                | 1          | 2            | 2         |
|                    | SAR <sub>LOW</sub> | 5          | 2               | 2                | 5          | 5            | 9         |
| Turbo Factor       | SAR <sub>RT</sub>  | 19         | 10              | 16               | 9          | 8            | 3         |
|                    | SAR <sub>LOW</sub> | 14         |                 |                  | 4          |              |           |
| TR                 | SAR <sub>RT</sub>  | 4000       | 4000            | 4000             | 650        | 1900         | 550       |
|                    | SAR <sub>LOW</sub> |            | 4200            |                  | 720        |              |           |
| Flip Angle         | SAR <sub>RT</sub>  | 150        | 150             | 150              | 150        | 150          | 150       |
|                    | SAR <sub>LOW</sub> | 120        | 120             | 120              | 120        | 120          | 120       |
| Slice Number       | SAR <sub>RT</sub>  | 15         | 15              | 15               | 15         | 15           | 25        |
|                    | SAR <sub>LOW</sub> |            | 7*              | 7*               | 7*         | 7*           | 12*       |
| Averages           | SAR <sub>RT</sub>  | 2          | 2               | 1                | 2          | 2            | 2         |
|                    | SAR <sub>LOW</sub> | 1          | 1               |                  | 1          | 1            | 1         |
| Phase Oversampling | SAR <sub>RT</sub>  | 100        | 80              | 90               | 80         | 80           | 50        |
|                    | SAR <sub>LOW</sub> | 45         | 70              | 45               | 60         | 70           |           |
| Parallel imaging   | SAR <sub>RT</sub>  | GRAPPA 2   | GRAPPA 2        | GRAPPA 2         | -          | GRAPPA 2     | -         |
|                    | SAR <sub>LOW</sub> |            |                 |                  | GRAPPA 2   |              | GRAPPA 2  |
| Phase Resolution   | SAR <sub>RT</sub>  | 80         | 70              | 75               | 75         | 75           | 75        |
|                    | SAR <sub>LOW</sub> | 65         |                 | 70               | 65         | 68           |           |
| Scan Time          | SAR <sub>RT</sub>  | 02:52      | 03:40           | 02:30            | 03:50      | 04:30        | 03:36     |
|                    | SAR <sub>LOW</sub> | 05:42      | 03:40*          | 03:38*           | 03:16*     | 04:56*       | 04:24*    |

Note: \*: Sequence was separated in 2 parts

-: Parameters not applicable in the sequence

~: Sequence was not able to be optimized for the SAR limit

\*\* : Sequence changed

**SUPPLEMENTAL TABLE 4.** Parameter values per sequence for standard (SAR<sub>RT</sub>) and low-SAR (SAR<sub>LOW</sub>) protocols for the T-spine anatomical region.

L-SPINE

|                    |                    | T2 TSE Sag | T2 TSE STIR Sag | T1 TSE Sag | T1 TSE Ax | T2 TSE Ax | T2 TSE MSMA Ax |
|--------------------|--------------------|------------|-----------------|------------|-----------|-----------|----------------|
| RF Pulse Type      | SAR <sub>RT</sub>  | Low SAR    | Fast            | Low SAR    | Low SAR   | Normal    | Low SAR        |
|                    | SAR <sub>LOW</sub> |            | Low SAR         |            |           | Low SAR   |                |
| Concatenations     | SAR <sub>RT</sub>  | 1          | 1               | 1          | 2         | 1         | 1              |
|                    | SAR <sub>LOW</sub> | 4          | 3               | 4          | 8         | 4         | 4              |
| Turbo Factor       | SAR <sub>RT</sub>  | 17         | 9               | 3          | 3         | 15        | 17             |
|                    | SAR <sub>LOW</sub> | 9          |                 |            |           |           |                |
| TR                 | SAR <sub>RT</sub>  | 3500       | 3500            | 550        | 550       | 4000      | 4000           |
|                    | SAR <sub>LOW</sub> | 4000       | 3600            | 600        | 600       |           |                |
| Flip Angle         | SAR <sub>RT</sub>  | 150        | 150             | 150        | 150       | 150       | 150            |
|                    | SAR <sub>LOW</sub> | 120        | 120             | 120        | 120       | 120       | 120            |
| Slice Number       | SAR <sub>RT</sub>  | 15         | 15              | 15         | 20        | 20        | 6              |
|                    | SAR <sub>LOW</sub> |            | 8               | 8          | 10        | 10        | 3              |
| Averages           | SAR <sub>RT</sub>  | 2          | 2               | 3          | 2         | 2         | 2              |
|                    | SAR <sub>LOW</sub> |            | 1               | 1          | 1         | 1         | 1              |
| Phase Oversampling | SAR <sub>RT</sub>  | 80         | 80              | 80         | 30        | 40        | 20             |
|                    | SAR <sub>LOW</sub> | 50         |                 |            |           |           |                |
| Parallel imaging   | SAR <sub>RT</sub>  | -          | GRAPPA 2        | -          | -         | -         | -              |
|                    | SAR <sub>LOW</sub> | GRAPPA 2   |                 |            | GRAPPA 2  | GRAPPA 2  | GRAPPA 2       |
| Phase Resolution   | SAR <sub>RT</sub>  | 70         | 80              | 70         | 85        | 75        | 80             |
|                    | SAR <sub>LOW</sub> | 50         |                 |            |           |           |                |
| Scan Time          | SAR <sub>RT</sub>  | 03:28      | 02:44           | 03:48      | 03:34     | 03:48     | 02:44          |
|                    | SAR <sub>LOW</sub> | 05:06      | 04:10           | 04:52      | 04:11     | 04:18     | 02:58          |

Note: \*: Sequence was separated in 2 parts

-: Parameters not applicable in the sequence

~: Sequence was not able to be optimized for the SAR limit

\*\* : Sequence changed

**SUPPLEMENTAL TABLE 5.** Parameter values per sequence for standard (SAR<sub>RT</sub>) and low-SAR (SAR<sub>LOW</sub>) protocols for the T-spine anatomical region.

|         |                  | SNR ROI1          |                    | SNR ROI2          |                    | CNR               |                    | PERCENTAGE CHANGE |          |        |
|---------|------------------|-------------------|--------------------|-------------------|--------------------|-------------------|--------------------|-------------------|----------|--------|
|         |                  | SAR <sub>RT</sub> | SAR <sub>LOW</sub> | SAR <sub>RT</sub> | SAR <sub>LOW</sub> | SAR <sub>RT</sub> | SAR <sub>LOW</sub> | SNR ROI1          | SNR ROI2 | CNR    |
| Head    | T1 SE SAG        | 259.1             | 76.5               | 202.7             | 58.4               | 56.4              | 18.1               | -70.5             | -71.2    | -67.9  |
|         | T1 SE COR        | 99.5              | 75.8               | 118.5             | 93.4               | 19.0              | 17.6               | -23.8             | -21.2    | -7.4   |
|         | T2 TSE AX        | 34.3              | 31.9               | 31.7              | 24.5               | 2.6               | 7.5                | -7.0              | -22.8    | 182.4  |
|         | T2 TSE DF AX     | 68.7              | 46.6               | 101.5             | 70.6               | 32.8              | 24.0               | -32.2             | -30.5    | -26.8  |
|         | DIFFUSION AX     | 95.8              | 89.3               | 105.3             | 102.0              | 9.5               | 12.7               | -6.8              | -3.2     | 33.6   |
|         | TOF              | 28.2              | 58.5               | 27.9              | 53.9               | 0.3               | 4.6                | 107.7             | 93.1     | 1686.3 |
| C-spine | T2 TSE SAG       | 115.6             | 107.8              | 126.6             | 79.2               | 11.0              | 28.6               | -6.7              | -37.4    | 160.7  |
|         | T2 TSE STIR SAG  | 117.1             | 117.1              | 109.3             | 92.2               | 7.8               | 24.9               | 0.0               | -15.7    | 219.2  |
|         | T1 TSE SAG       | 76.7              | 47.4               | 89.9              | 57.4               | 13.2              | 10.0               | -38.1             | -36.2    | -24.6  |
|         | T1 TSE DF SAG    | 25.3              | 16.9               | 54.8              | 42.6               | 29.6              | 25.7               | -33.3             | -22.3    | -13.0  |
|         | T2 TSE AX        | 133.9             | 111.5              | 94.7              | 62.1               | 39.2              | 49.4               | -16.7             | -34.4    | 26.0   |
|         | T2 SSFP-3D AX    | 11.4              | 8.4                | 12.9              | 13.2               | 1.5               | 4.8                | -26.7             | 2.1      | 223.3  |
| T-spine | T2 TSE SAG       | 92.4              | 88.4               | 38.3              | 31.4               | 54.1              | 57.0               | -4.3              | -18.1    | 5.4    |
|         | T2 TSE STIR SAG  | 79.9              | 82.2               | 48.5              | 34.4               | 31.3              | 47.7               | 2.9               | -29.0    | 52.2   |
|         | T2 TSE DIXON SAG | 119.2             | 141.4              | 45.9              | 56.4               | 73.3              | 85.0               | 18.7              | 22.9     | 16.0   |
|         | T1 TSE SAG       | 60.4              | 43.9               | 203.5             | 131.0              | 143.1             | 87.1               | -27.3             | -35.6    | -39.1  |
|         | T1 TSE DF SAG    | 18.3              | 12.6               | 160.4             | 122.2              | 142.0             | 109.6              | -31.2             | -23.8    | -22.8  |
|         | T1 TSE AX        | 35.1              | 17.5               | 125.0             | 56.1               | 89.9              | 38.6               | -50.1             | -55.1    | -57.1  |
| L-spine | T2 TSE SAG       | 78.1              | 53.1               | 39.6              | 18.0               | 38.4              | 35.1               | -32.0             | -54.5    | -8.8   |
|         | T2 TSE STIR SAG  | 59.4              | 62.4               | 32.7              | 22.0               | 26.7              | 40.4               | 5.0               | -32.7    | 50.9   |
|         | T1 TSE SAG       | 42.4              | 30.3               | 106.6             | 98.0               | 64.3              | 67.7               | -28.4             | -8.1     | 5.3    |
|         | T1 TSE DF SAG    | 39.8              | 36.2               | 53.9              | 68.8               | 14.0              | 32.6               | -9.0              | 27.7     | 131.9  |
|         | T2 TSE AX        | 120.6             | 86.2               | 25.6              | 9.8                | 95.0              | 76.4               | -28.5             | -61.6    | -19.6  |
|         | T2 TSE MSMA AX   | 115.7             | 40.7               | 27.4              | 7.7                | 88.3              | 33.0               | -64.8             | -71.8    | -62.7  |

**SUPPLEMENTAL TABLE 6.** SNR, CNR AND PERCENTAGE CHANGE VALUES PER SEQUENCE PER PROTOCOL FOR SAR<sub>RT</sub> AND SAR<sub>LOW</sub>.

| Head                |                     |     | C-spine                |                                 |     |
|---------------------|---------------------|-----|------------------------|---------------------------------|-----|
| <i>T1 SE Sag</i>    | –                   |     | <i>T2 TSE Sag</i>      | –                               |     |
| <i>T1 SE Cor</i>    | –                   |     | <i>T2 TSE STIR Sag</i> | TR:4000,<br>FA:130              | 2/5 |
| <i>T2 TSE Ax</i>    | TR: 13500-<br>15500 | 1/5 | <i>T1 TSE Sag</i>      | TR:750,<br>FA:120               | 4/5 |
| <i>T2 TSE DF Ax</i> | –                   | 3/5 | <i>T1 TSE DF Sag</i>   | TR:2500-<br>2700,<br>FA:120-130 | 5/5 |
| <i>Diffusion Ax</i> | TR:5500             | 2/5 | <i>T2 TSE Ax</i>       | TR:8000                         | 1/5 |
| <i>TOF Ax</i>       | TR:55-70            | 3/5 | <i>T2 SSFP-3D AX</i>   | FA:45-47                        | 5/5 |

| T-spine                 |                  |     | L-spine                |                  |     |
|-------------------------|------------------|-----|------------------------|------------------|-----|
| <i>T2 TSE Sag</i>       | TR:4500          | 3/5 | <i>T2 TSE Sag</i>      | TR:4000-<br>4700 | 3/5 |
| <i>T2 TSE STIR Sag</i>  | TR:5000-<br>5500 | 4/5 | <i>T2 TSE STIR Sag</i> | TR:4200          | 2/5 |
| <i>T2 TSE DIXON Sag</i> | TR:4500-<br>5600 | 5/5 | <i>T1 TSE Sag</i>      | TR:700-720       | 2/5 |
| <i>T1 TSE Sag</i>       | TR:750-780       | 3/5 | <i>T1 TSE Ax</i>       | TR:700           | 3/5 |
| <i>T1 TSE DF Sag</i>    | –                |     | <i>T2 TSE Ax</i>       | TR:4500          | 3/5 |
| <i>T1 TSE Ax</i>        | TR:600-620       | 4/5 | <i>T2 TSE MSMA Ax</i>  | TR:4500          | 3/5 |

**SUPPLEMENTAL TABLE 7.** In situ parameter modification performed in some volunteers to reach whole body SAR of 0.1 W/kg and local-head SAR of 0.3 W/kg.
